# Supplementary material
Source: publisher figshare collection journal article supplement (https://sage.figshare.com/ndownloader/files/13569626)
Supplement: Supplementary file 1 [file 13569626]

Veterinary Pathology: Supplemental Materials.  
Asín et al. Granulomas following subcutaneous injection with  
aluminum adjuvant-containing products in sheep.

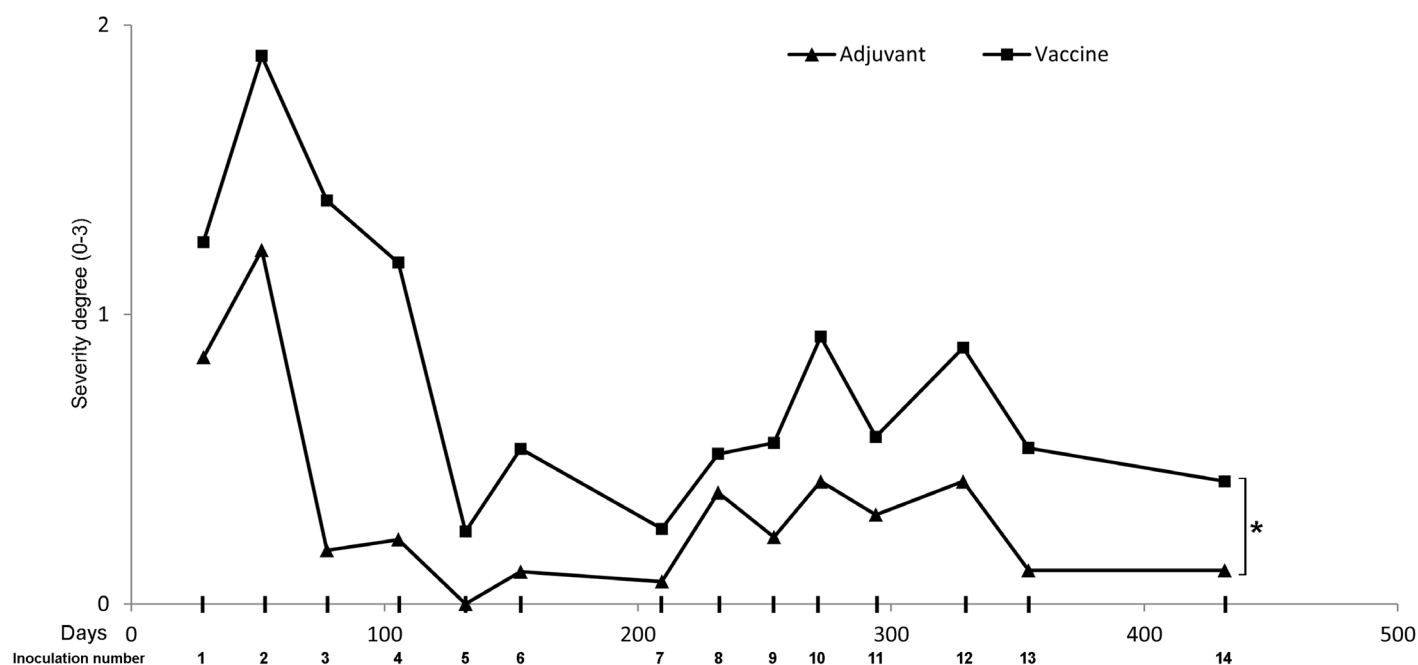

S1

Supplemental Figure S1. Degree of severity of in vivo post-inoculation local reactions, evaluated by palpation. Each value is the mean of the degree of severity in the group at an evaluation date.

Days: Days post first inoculation.

Inoculation number: Sequential number of a given inoculation (Supplemental Table S2)

\*P<.001. Mann Whitney's U test.

Veterinary Pathology: Supplemental Materials.  
Asín et al. Granulomas following subcutaneous injection with  
aluminum adjuvant-containing products in sheep.

**Supplemental Table S1.** Characteristics of the lambs and flocks used.

| Flock | Breed                  | Geographic location                                        | Management                                       |
|-------|------------------------|------------------------------------------------------------|--------------------------------------------------|
| 1     | Purebred <sup>a</sup>  | Experimental farm <sup>c</sup><br>(University of Zaragoza) | Fully indoor; treatment<br>groups not in contact |
| 2     | Crossbred <sup>b</sup> | River Valley <sup>d</sup>                                  | Intensive <sup>g</sup>                           |
| 3     | Crossbred <sup>b</sup> | Pre-Pyrenees area <sup>e</sup>                             | Extensive <sup>g</sup>                           |
| 4     | Purebred <sup>a</sup>  | River Valley <sup>f</sup>                                  | Extensive <sup>g</sup>                           |

<sup>a</sup>: Rasa Aragonesa breed

<sup>b</sup>: Commercial crosses of Rasa Aragonesa x Romanov

<sup>c</sup>: 41°41'N 0°52'W

<sup>d</sup>: 41°31'N 0°32'W

<sup>e</sup>: 42°9'N 0°12'W

<sup>f</sup>: 41°36'N 0°41'W

<sup>g</sup>: Treatment groups pooled together and mixed with the rest of the flock

Veterinary Pathology: Supplemental Materials.  
Asín et al. Granulomas following subcutaneous injection with  
aluminum adjuvant-containing products in sheep.

**Supplemental Table S2.** Description of the vaccines used. Aluminum content was established by inductively coupled plasma atomic emission spectrometry and calculated per total dose.

| Vaccine number<br>(Fig. 1) | Commercial name    | Manufacturer           | Antigen/s                                                                                    | Injection number<br>(Fig. 1) | Injection flank |          | mg of Al per dose |
|----------------------------|--------------------|------------------------|----------------------------------------------------------------------------------------------|------------------------------|-----------------|----------|-------------------|
|                            |                    |                        |                                                                                              |                              | Right (n)       | Left (n) |                   |
| 1                          | Heptavac P Plus    | MSD Animal Health S.L. | <i>Pasteurella multocida</i> ,<br><i>Mannheimia haemolytica</i> ,<br><i>Clostridium</i> spp. | 1, 2, 9                      | 2               | 1        | 7.5               |
| 2                          | Autogenous vaccine | Exopol                 | <i>Staphylococcus aureus</i> spp. <i>anaerobius</i>                                          | 3, 4, 14                     | 3               | NA       | 1.64              |
| 3                          | Vanguard R         | Zoetis                 | Rabies virus                                                                                 | 5                            | 1               | NA       | 1.03              |
| 4                          | Agalaxipra         | Hipra                  | <i>Mycoplasma agalactiae</i>                                                                 | 6, 7                         | 2               | NA       | 6.76              |
| 5                          | Ovovac CS          | Hipra                  | <i>Chlamydophila abortus</i> ,<br><i>Salmonella abortus ovis</i>                             | 8, 9                         | 2               | NA       | 5.60              |
| 6                          | Autogenous vaccine | Exopol                 | <i>Corynebacterium pseudotuberculosis</i>                                                    | 10, 11                       | 2               | NA       | 1.32              |
| 7                          | Bluevac-1          | CZ Veterinaria S.A.    | Bluetongue virus serotype 1                                                                  | 12, 13                       | 2               | NA       | 4.18              |
| 8                          | Bluevac-4          | CZ Veterinaria S.A.    | Bluetongue virus serotype 4                                                                  | 12, 13                       | NA              | 2        | 4.16              |
| 9                          | Bluevac BTV 8      | CZ Veterinaria S.A.    | Bluetongue virus serotype 8                                                                  | 15, 16                       | 2               | NA       | 4.40              |

Abbreviations: NA: Not applicable

Veterinary Pathology: Supplemental Materials.  
Asín et al. Granulomas following subcutaneous injection with  
aluminum adjuvant-containing products in sheep.

**Supplemental Table S3.** Histopathological evaluation of the granulomas.

| Granulomas                      | Scoring          | Description                                                                                                                                                                                                |
|---------------------------------|------------------|------------------------------------------------------------------------------------------------------------------------------------------------------------------------------------------------------------|
| Voluminous macrophages          | 0 to 3           | 0: Absence<br>1: Less than 50 % of the cell population<br>2: 50 % to 75 % of the cell population<br>3: More than 75 % of the cell population                                                               |
| Multinucleated giant cells      | P/A <sup>a</sup> | >3 nuclei giant cells, either foreign body or Langhans type                                                                                                                                                |
| Lymphocytes                     | 0 to 3           | 0: Absence<br>1: 1-2 inconspicuous groups<br>2: 3-4 readily visible groups<br>3: >4 voluminous groups                                                                                                      |
| Tertiary lymphoid tissue        | P/A              | Group/s of densely packed lymphocytes with formation of germinal centers                                                                                                                                   |
| Neutrophils                     | P/A              | Group/s of >10 neutrophils                                                                                                                                                                                 |
| Necrosis                        | 0 to 3           | 0: Absence<br>1: Slight multifocal eosinophilia<br>2: Central necrosis <50% of the section<br>3: Central necrosis >50% of the section                                                                      |
| Mineralization                  | 0 to 3           | 0: Absence<br>1: Rare, amorphous, multifocal <50 µm in diameter<br>2: Well-defined, crystalloid, coalescing areas 50-200 µm in diameter<br>3: Markedly crystalloid coalescing areas 200-500 µm in diameter |
| External fibrosis (capsule)     | P/A              | > 15 µm collagenous capsule                                                                                                                                                                                |
| Internal fibrosis               | P/A              | Streams, bundles and trabeculae of fibrocytes, fibroblasts and collagen fibers                                                                                                                             |
| Internal hemorrhages            | P/A              | Aggregates of extravasated erythrocytes between macrophages                                                                                                                                                |
| External hemorrhages            | P/A              | Aggregates of extravasated erythrocytes in the capsule and/or peripheral tissue                                                                                                                            |
| Internal blood vessels          | P/A              | Newly-formed blood vessels between macrophages                                                                                                                                                             |
| Eosinophilic crystalloid bodies | 0 to 3           | 0: Absence<br>1: 1-4 bodies<br>2: 5-8 bodies<br>3: >9 bodies                                                                                                                                               |

<sup>a</sup>: P/A: Presence/Absence

Veterinary Pathology: Supplemental Materials.  
Asín et al. Granulomas following subcutaneous injection with  
aluminum adjuvant-containing products in sheep.

**Supplemental Table S4.** Histopathological evaluation of the right preescapular lymph nodes.

| Lymph nodes                          | Scoring          | Description                                                                                                                                                                                                                                                 |
|--------------------------------------|------------------|-------------------------------------------------------------------------------------------------------------------------------------------------------------------------------------------------------------------------------------------------------------|
| Cortical hyperplasia                 | 0 to 3           | 0: Absence.<br>1: Mild increase in cortical thickness. Non-coalescing lymphoid follicles<br>2: Moderate increase in cortical thickness. Increased lymphoid follicles<br>3: Marked and diffuse increase in cortical thickness. Coalescing lymphoid follicles |
| Prominent germinal centers           | 0 to 3           | 0: Absence.<br>1: <50 % of follicles show germinal center<br>2: 50-75 % of follicles show germinal center<br>3: >75 % of follicles show a germinal center with increase in size                                                                             |
| Aggregates of voluminous macrophages | P/A <sup>*</sup> | At least 4, 15-25 µm macrophages with foamy to granulated cytoplasm                                                                                                                                                                                         |

<sup>\*</sup> P/A: Presence/absence
